# Supplementary material for: Cellular Sources and Neuroprotective Roles of Interleukin-10 in the Facial Motor Nucleus after Axotomy
Source: MDPI journal article supplement (doi:10.3390/cells11193167), 2022-10-09
Supplement: s1 [file s1]

# Supplementary Materials

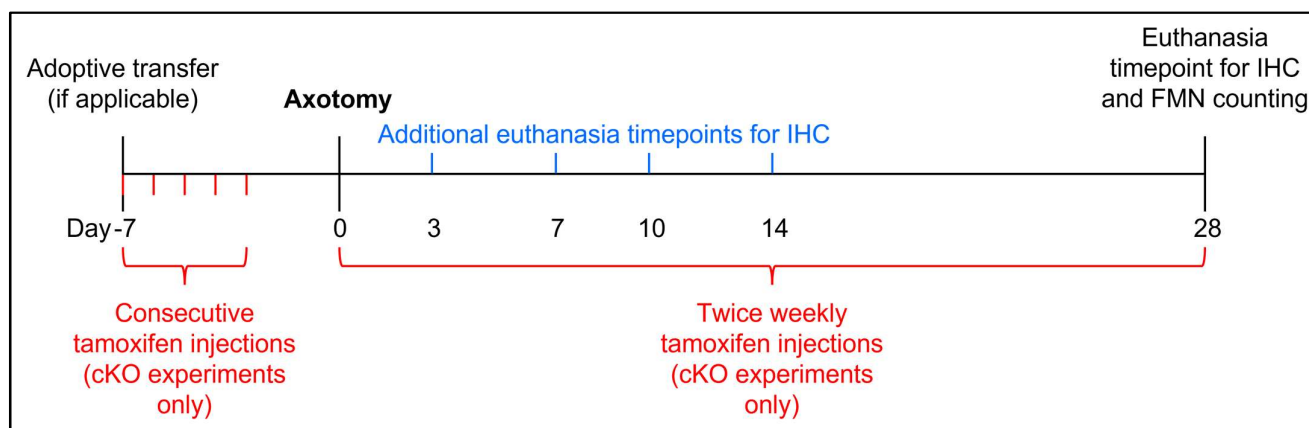

**Figure S1.** Timelines for experiments in relation to axotomy at day 0. *cKO* = conditional knockout, *IHC* = immunohistochemistry, *FMN* = facial motoneuron
